# Supplementary material for: The Hexokinase 1 5′-UTR Mutation in Charcot–Marie–Tooth 4G Disease Alters Hexokinase 1 Binding to Voltage-Dependent Anion Channel-1 and Leads to Dysfunctional Mitochondrial Calcium Buffering
Source: MDPI journal article supplement (doi:10.3390/ijms25084364), 2024-04-15
Supplement: s1 [file s1]

Table S1

|                                           | <b>CMT (Lom)</b>                                                                      | <b>CMT4G</b>                                             | <b>CMT4C</b>                                                                                                       |
|-------------------------------------------|---------------------------------------------------------------------------------------|----------------------------------------------------------|--------------------------------------------------------------------------------------------------------------------|
| <b>Mutated gene</b>                       | <b>NDRG1</b><br>- p.R148X in gipsy population<br>- Duplication of exons 6-8 in Turkey | <b>HK1</b><br>g.9712C                                    | <b>SH3TC2</b><br>- Many variants reported<br>- p.Arg1109X and p.C737_P738delinsX are exclusive of gypsy population |
| <b>Epidemiology</b>                       | - Gypsy population from Spain, Slovenia, Bulgaria and Italy<br>-Turkey                | - Gypsy population from Spain<br>- Slovakia and Bulgaria | Mediterranean countries                                                                                            |
| <b>Mean age of onset (yr)</b>             | 6.7                                                                                   | 11                                                       | Variable                                                                                                           |
| <b>Age of upper limb involvement (yr)</b> | 12.7                                                                                  | 22                                                       | Variable                                                                                                           |
| <b>Evolution</b>                          | Wheelchair bound by the age >25-40 yr                                                 | Wheelchair bound by the age of >50 yr                    | Variable                                                                                                           |
| <b>Other clinical signs</b>               | Deafness, lingual atrophy                                                             | -                                                        | Deafness, lingual atrophy                                                                                          |
| <b>Median nerve NCV (m/s)</b>             | 9.6                                                                                   | 20-32                                                    | 13-30 with C. block                                                                                                |
| <b>SNAP</b>                               | Absent                                                                                | Absent                                                   | Absent                                                                                                             |
| <b>Biopsy</b>                             | Onion bulbs                                                                           | Clusters of regeneratives fibers                         | Onion bulbs                                                                                                        |

yr: years; CMAP: compound motor action potential; CMTNS: Charcot-Marie-Tooth Neuropathy Score; MNCV: motor nerve conduction velocity; NR: not response; ND: Not done; SNAP: sensory nerve action potential
